# Supplementary material
Source: publisher site journal article supplement (https://www.dovepress.com/get_supplementary_file.php?f=495455-Appendix.docx)
Supplement: Supplementary file 1 [file get_supplementary_file.php]

Appendix 1

The COVISTRESSnetwork is headed by Pr. [Frédéric Dutheil](https://url.us.m.mimecastprotect.com/s/sk2fCR6MLxf5Oo4m5cNhZT1felq?domain=lapsco.fr) ([frederic.dutheil@uca.fr](mailto:frederic.dutheil@uca.fr)) – CHU Clermont-Ferrand, Occupational and Environmental Medicine, 58 rue Montalembert, 63000 Clermont-Ferrand, France. Members of the research group are [Maëlys Clinchamps](https://url.us.m.mimecastprotect.com/s/yW4zCVO5NBcgZmqwghyiyTEFrio?domain=linkedin.com), [Stéphanie Mestres](https://url.us.m.mimecastprotect.com/s/3223CW6w8DfD4Zr9DfnsRToVITE?domain=linkedin.com), [Cécile Miele](https://url.us.m.mimecastprotect.com/s/dEw-CXD7MEUO9jE5OcmtJTWipKs?domain=linkedin.com), [Valentin Navel](https://url.us.m.mimecastprotect.com/s/nynVCYEQMGiA9mV1AcZuLTxLjAV?domain=researchgate.net), [Lénise Parreira](https://url.us.m.mimecastprotect.com/s/M7TfCZ6wWJfQjAK4QFXC0TBO9p1?domain=linkedin.com), [Bruno Pereira](https://url.us.m.mimecastprotect.com/s/EI50C1wY98hqZxJzqhOFyTVWje6?domain=researchgate.net), [Karine Rouffiac](https://url.us.m.mimecastprotect.com/s/lCB-C2kg95i8mW5l8hLHNT5yIzy?domain=researchgate.net) – CHU Clermont-Ferrand, France; [Yves Boirie](https://url.us.m.mimecastprotect.com/s/V929C31j95h24oDA2IpIVTQSTgY?domain=researchgate.net), [Jean-Baptiste Bouillon-Minois](https://url.us.m.mimecastprotect.com/s/K2baC4xk97tl8E40lC5S9T46q4L?domain=linkedin.com), [Martine Duclos](https://url.us.m.mimecastprotect.com/s/Dbu8C5ylW5F6l3kj6SVT2TkKgCP?domain=researchgate.net), [Maria Livia Fantini](https://url.us.m.mimecastprotect.com/s/rES8C68m05HyW7LOyhQUwT5UXs4?domain=researchgate.net), [Jeannot Schmidt](https://url.us.m.mimecastprotect.com/s/Mwv5C73nA5IZR2GpZU1cRTor0qm?domain=google.com), [Stéphanie Tubert-Jeannin](https://url.us.m.mimecastprotect.com/s/6bYZC82o95fYkWNvYFlfDTyMqdW?domain=researchgate.net) – Université Clermont Auvergne / CHU Clermont-Ferrand, France; [Mickael Berthon](https://url.us.m.mimecastprotect.com/s/RvlBC9rp25H2OA432IVhXTqUwg4?domain=lapsco.fr), [Pierre Chausse](https://url.us.m.mimecastprotect.com/s/RvlBC9rp25H2OA432IVhXTqUwg4?domain=lapsco.fr), [Michael Dambrun](https://url.us.m.mimecastprotect.com/s/7Zv7C0R296fmyQNomI8ioT9cwpJ?domain=dambrunmichael.yolasite.com/), [Sylvie Droit-Volet](https://url.us.m.mimecastprotect.com/s/_oByCgJxkgiGBKE0Gs5s1T4XhTC?domain=loop.frontiersin.org), [Julien Guegan](https://url.us.m.mimecastprotect.com/s/RvlBC9rp25H2OA432IVhXTqUwg4?domain=lapsco.fr), [Serge Guimond](https://url.us.m.mimecastprotect.com/s/ToB4CjRvnlfRODo5RHqtBTmHGfw?domain=lapsco.fr), [Laurie Mondillon](https://url.us.m.mimecastprotect.com/s/HrhNCkRwomf5wA2W5cjuyTGE5hm?domain=lapsco.fr), [Armelle Nugier](https://url.us.m.mimecastprotect.com/s/5QijClYvpnuXMmRnXSECVTzPOcR?domain=lapsco.fr), [Pascal Huguet](https://url.us.m.mimecastprotect.com/s/Q2cUCmZ2EotWM8yJWuWFJTRSXFw?domain=lapsco.fr) – Université Clermont Auvergne, CNRS, LAPSCO, France; [Samuel Dewavrin](https://url.us.m.mimecastprotect.com/s/CVuBCn5YzpcmWg9OmILHPTJ0Sn3?domain=linkedin.com) – WittyFit, France; [Sébastien Couarraze](https://url.us.m.mimecastprotect.com/s/TBDZCo2vOqfvw52qvUvIoTpgS8n?domain=researchgate.net), [Louis Delamarre](https://url.us.m.mimecastprotect.com/s/Yu73CpYRz0uAwq4MAcQSDTGppAS?domain=researchgate.net), [Fouad Marhar](https://url.us.m.mimecastprotect.com/s/fOVTCqxV2vtX2nY0XSPTzTEkpU2?domain=linkedin.com) – CHU Toulouse, France; [Martial Mermillod](https://url.us.m.mimecastprotect.com/s/sL0jCrkEYwi2m7QV2IvUyT4iq8z?domain=scholar.google.fr) – CHU Toulouse, France; [Geraldine Naughton](https://url.us.m.mimecastprotect.com/s/IK0jCv2YjAfAlqwNAcKc5TQhLfc?domain=researchgate.net), [Amanda Benson](https://url.us.m.mimecastprotect.com/s/2AchCwpEkBHyNkl8yh7fmTJy5yC?domain=researchgate.net) – Swinburne University, Australia; [Claus Lamm](https://url.us.m.mimecastprotect.com/s/AAJaCxkVlDixXDEMxhphQTyQb_z?domain=en.wikipedia.org) – University of Vienna, Austria; [Karen Gbaglo](https://url.us.m.mimecastprotect.com/s/GR69CyP6mEtL4KOXLu3iRTxHzFI?domain=linkedin.com), Ministery of Health; Benin; [Vicky Drapeau](https://url.us.m.mimecastprotect.com/s/OqnOCzpBnGH4rEWg4CPs9T9D28X?domain=fse.ulaval.ca/) – Université de Laval, Canada; [Raimundo Avilés Dorlhiac](https://url.us.m.mimecastprotect.com/s/I7a7CADQm5UERBp6Eu7tjTGHDgx?domain=linkedin.com/) – Universidad Finis Terrae, Chile; [Benjamin Bustos](https://url.us.m.mimecastprotect.com/s/T-YbCBB8n5t8n0W68hqu8T2bheE?domain=linkedin.com) – Universidad de Los Andes, Chile; [Gu Yaodong](https://url.us.m.mimecastprotect.com/s/_CFSCDkY05i3xwYv3hGClTjvDfs?domain=loop.frontiersin.org) – Ningbo University, China; [Haifeng Zhang](https://url.us.m.mimecastprotect.com/s/BSNeCERZP5fpqO49pIlFZT7LJAO?domain=researchgate.net) – Hebei Normal University, China; [Peter Dieckmann](https://url.us.m.mimecastprotect.com/s/AyEgCG6Y9jfA8E3YAc3HxTBpQgi?domain=uis.no) – Copenhagen Academy for Medical Education and Simulation (CAMES), Denmark; [Julien Baker](https://url.us.m.mimecastprotect.com/s/IKmYCJ6YPmfKnl9rKT6IGTyonXX?domain=pe.hkbu.edu.hk), [Yanping Duan](https://url.us.m.mimecastprotect.com/s/l13PCKrY6nH41P7E4CzSvT50XmC?domain=pe.hkbu.edu.hk), [Yang Gemma Gao](https://url.us.m.mimecastprotect.com/s/61rhCL9YPoHQ3VBjQFOTOTynXr1?domain=pe.hkbu.edu.hk), [Yajun Wendy Huang](https://url.us.m.mimecastprotect.com/s/cX1JCM8E9pHzJDBOzCnU3T8PHy8?domain=pe.hkbu.edu.hk), [Jiao Jiao](https://url.us.m.mimecastprotect.com/s/qroHCNkE8qij6JkljU1ckTy8PPS?domain=linkedin.com), [Binh Quach](https://url.us.m.mimecastprotect.com/s/xvyKCOYEZruvOl1RvUnfATGRCOW?domain=researchgate.net), [Chunqing Zhang](https://url.us.m.mimecastprotect.com/s/yF2cCPNMYvt369zG3hzlhGTxrJI5?domain=pe.hkbu.edu.hk), Hong Kong Baptist University, China; [Anamitra Basu](https://url.us.m.mimecastprotect.com/s/01JRCQWNOwhoRgvAouxxinTGPes8?domain=researchgate.net), [Mohua Das Gupta](https://url.us.m.mimecastprotect.com/s/ZvBwCR6MLxf5Oo4m5c9NsZT1_fry?domain=researchgate.net), IIT Bhubaneshwar, India; [Hijrah Nasir](https://url.us.m.mimecastprotect.com/s/ssioCVO5NBcgZmqwghGytyTEjXpE?domain=linkedin.com), Indonesia; [Perluigi Cocco](https://url.us.m.mimecastprotect.com/s/R5YSCW6w8DfD4Zr9Df6nuRToG2P-?domain=researchgate.net), [Rosamaria Lecca](https://url.us.m.mimecastprotect.com/s/6kn6CXD7MEUO9jE5Oc6mCJTW7PhP?domain=researchgate.net), [Monica Puligheddu](https://url.us.m.mimecastprotect.com/s/unA7CYEQMGiA9mV1Ac0ZcLTxEuOv?domain=loop.frontiersin.org), [Michela Figorilli](https://url.us.m.mimecastprotect.com/s/0WzkCZ6wWJfQjAK4QFzXH0TBlIru?domain=researchgate.net), Università di Cagliari, Italia ; [Morteza Charkhabi](https://url.us.m.mimecastprotect.com/s/Q1SPC1wY98hqZxJzqhLOIyTVLOey?domain=researchgate.net), [Reza Bagheri](https://url.us.m.mimecastprotect.com/s/zSdLC2kg95i8mW5l8hnLSNT582x-?domain=researchgate.net) – University of Isfahan, Iran; [Daniela Pfabigan](https://url.us.m.mimecastprotect.com/s/Zy43C31j95h24oDA2IgpTVTQJoeV?domain=danielapfabigan.com/) – University of Oslo, Norway;  [Peter Dieckmann](https://url.us.m.mimecastprotect.com/s/AyEgCG6Y9jfA8E3YAc3HxTBpQgi?domain=uis.no), University of Stavanger, Norway; [Marek Zak](https://url.us.m.mimecastprotect.com/s/B64RC4xk97tl8E40lCO5U9T4N4r2?domain=researchgate.net), [Tomasz Sikorski](https://url.us.m.mimecastprotect.com/s/IRdBC5ylW5F6l3kj6SzVc2TkIBhW?domain=researchgate.net), [Magdalena Wasik](https://url.us.m.mimecastprotect.com/s/rOu4C68m05HyW7LOyhpQfwT5ysmG?domain=researchgate.net) – Jan Kochanowski University of Kielce, Poland; [Samuel Antunes](https://url.us.m.mimecastprotect.com/s/U7iKC73nA5IZR2GpZU81cRTo9cBB?domain=linkedin.com/), [David Neto](https://url.us.m.mimecastprotect.com/s/834qC82o95fYkWNvYFnliDTy4AxX?domain=linkedin.com), [Pedro Almeida](https://url.us.m.mimecastprotect.com/s/zjssC9rp25H2OA432IoVsXTqUXHE?domain=linkedin.com/) – Ordem dos Psicólogos Portugueses, ISPA-Instituto Universitário, Portugal; [Maria João Gouveia](https://url.us.m.mimecastprotect.com/s/11DxC0R296fmyQNomIw8toT9VX-A?domain=linkedin.com/) – ISPA-Instituto Universitário, Portugal; [Pedro Quinteiro](https://url.us.m.mimecastprotect.com/s/SUlsCgJxkgiGBKE0GsN5u1T46IHu?domain=linkedin.com/) – William James Center for Research, ISPA-Instituto Universitário; [Constanta Urzeala](https://url.us.m.mimecastprotect.com/s/OOoqCjRvnlfRODo5RHWqCBTmgu0N?domain=researchgate.net) – UNEFS, Romania; [Benoit Dubuis](https://url.us.m.mimecastprotect.com/s/4qUcCkRwomf5wA2W5c2jTyTGtLF-?domain=linkedin.com/) – UNIGE, Switzerland; [Juliette Lemaignen](https://url.us.m.mimecastprotect.com/s/BnR4ClYvpnuXMmRnXSGEHVTz0xUf?domain=linkedin.com/) – Fondation INARTIS, Switzerland; [Kuan-Chou Chen](https://url.us.m.mimecastprotect.com/s/At9RCmZ2EotWM8yJWuGWIJTR0UvP?domain=sportmanagement.ntupes.edu.tw), National Taiwan University of Sport, Taiwan; [Andy Su-I Liu](https://url.us.m.mimecastprotect.com/s/K-y-Cn5YzpcmWg9OmI9LFPTJEyn7?domain=english-medium-instruction-research-center-utaipei0.webnode.tw/) – University of Taipei, Taiwan; [Foued Saadaoui](https://url.us.m.mimecastprotect.com/s/5-ClCo2vOqfvw52qvU1vioTpEeGJ?domain=ihecso.rnu.tn), King Abdulaziz University, Tunisia; [Ukadike C Ugbolue](https://url.us.m.mimecastprotect.com/s/syUcCpYRz0uAwq4MAcPQUDTGHhvC?domain=researchgate.net), University of the West of Scotland, United Kingdom; [Keri Kulik](https://url.us.m.mimecastprotect.com/s/jFaSCqxV2vtX2nY0XSZPczTEjGJb?domain=iup.edu/) – Indiana University of Pennsylvania, USA".
